# Supplementary material for: Evolutionary Comparisons of Chelonid Alphaherpesvirus 5 (ChHV5) Genomes from Fibropapillomatosis-Afflicted Green (Chelonia mydas), Olive Ridley (Lepidochelys olivacea) and Kemp’s Ridley (Lepidochelys kempii) Sea Turtles
Source: MDPI journal article supplement (doi:10.3390/ani11092489), 2021-08-25

# ChHV5 genes ranked by selection pressure, gene level results from this study versus Morrison et al. 2018 results

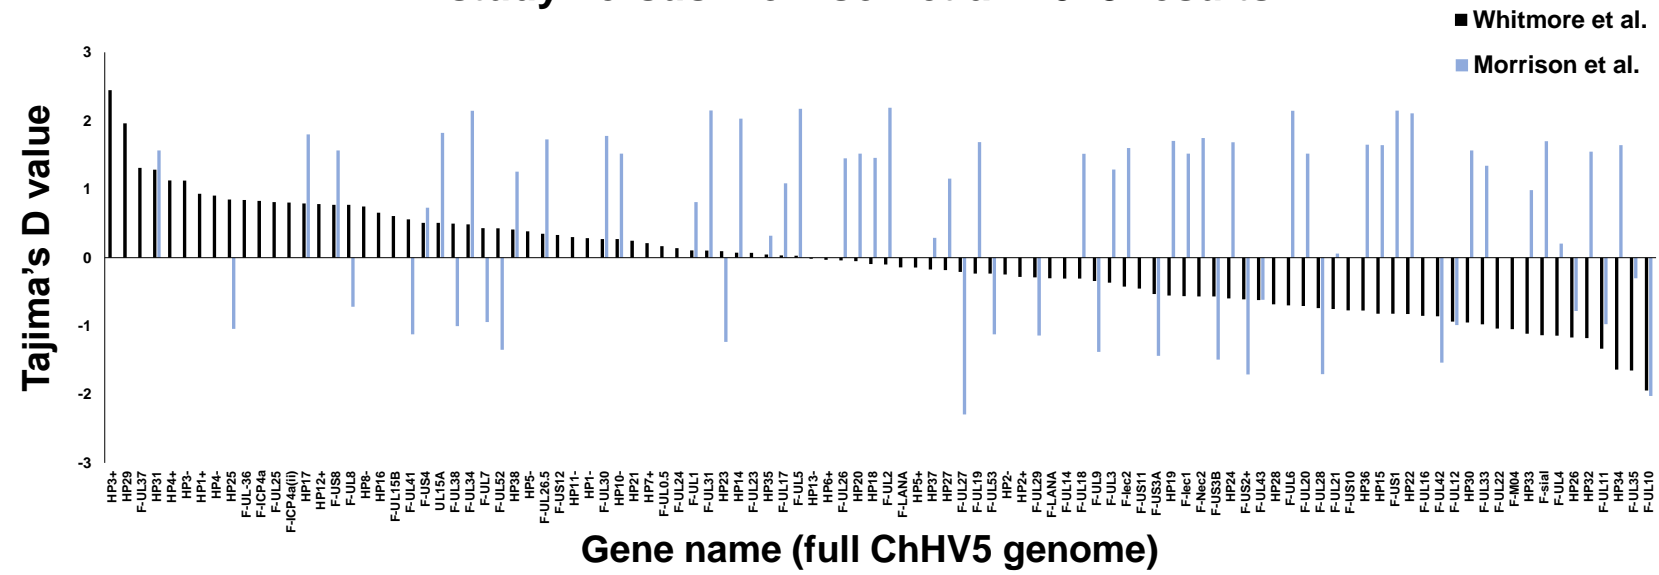

Supplement: s1 [file s1]
